# Supplementary material for: Identification of Candidate Parkinson Disease Genes by Integrating Genome-Wide Association Study, Expression, and Epigenetic Data Sets
Source: PubMed Central journal article supplement (PMC7851759; doi:10.1001/jamaneurol.2020.5257), 2021-02-01
Supplement: jamaneurol-e205257-s0010.pdf [file jamaneurol-e205257-s0010.pdf]

| <b>Group Name: The United Kingdom Brain Expression Consortium (UKBEC) and the International Parkinson's Disease Genomics Consortium (IPDGC) members</b> |              |        |                  |             |                                          |                                                         |                                  |
|---------------------------------------------------------------------------------------------------------------------------------------------------------|--------------|--------|------------------|-------------|------------------------------------------|---------------------------------------------------------|----------------------------------|
| First Name and Middle Initial(s)                                                                                                                        | Last Name    | Suffix | Academic Degrees | Institution | Location (city, state/province, country) | Role or Contribution, eg, chair, principal investigator | Subgroup, eg, Steering Committee |
| Alastair J.                                                                                                                                             | Noyce        |        |                  |             |                                          |                                                         |                                  |
| Rauan                                                                                                                                                   | Kaiyrzhanov  |        |                  |             |                                          |                                                         |                                  |
| Ben                                                                                                                                                     | Middlehurst  |        |                  |             |                                          |                                                         |                                  |
| Demis A.                                                                                                                                                | Kia          |        |                  |             |                                          |                                                         |                                  |
| Manuela                                                                                                                                                 | Tan          |        |                  |             |                                          |                                                         |                                  |
| Henry                                                                                                                                                   | Houlden      |        |                  |             |                                          |                                                         |                                  |
| Huw R.                                                                                                                                                  | Morris       |        |                  |             |                                          |                                                         |                                  |
| Helene                                                                                                                                                  | Plun-Favreau |        |                  |             |                                          |                                                         |                                  |
| Peter                                                                                                                                                   | Holmans      |        |                  |             |                                          |                                                         |                                  |
| John                                                                                                                                                    | Hardy        |        |                  |             |                                          |                                                         |                                  |
| Daniah                                                                                                                                                  | Trabzuni     |        |                  |             |                                          |                                                         |                                  |
| Jose                                                                                                                                                    | Bras         |        |                  |             |                                          |                                                         |                                  |
| John Quinn                                                                                                                                              | PhD          |        |                  |             |                                          |                                                         |                                  |
| Kin Y.                                                                                                                                                  | Mok          |        |                  |             |                                          |                                                         |                                  |
| Kerri J.                                                                                                                                                | Kinghorn     |        |                  |             |                                          |                                                         |                                  |
| Kimberley                                                                                                                                               | Billingsley  |        |                  |             |                                          |                                                         |                                  |
| Nicholas W.                                                                                                                                             | Wood         |        |                  |             |                                          |                                                         |                                  |
| Patrick                                                                                                                                                 | Lewis        |        |                  |             |                                          |                                                         |                                  |
| Sebastian                                                                                                                                               | Schreglmann  |        |                  |             |                                          |                                                         |                                  |
| Rita                                                                                                                                                    | Guerreiro    |        |                  |             |                                          |                                                         |                                  |
| Ruth                                                                                                                                                    | Lovering     |        |                  |             |                                          |                                                         |                                  |
| Lea                                                                                                                                                     | R'Bibo       |        |                  |             |                                          |                                                         |                                  |
| Claudia                                                                                                                                                 | Manzoni      |        |                  |             |                                          |                                                         |                                  |
| Mie                                                                                                                                                     | Rizig        |        |                  |             |                                          |                                                         |                                  |
| Mina                                                                                                                                                    | Ryten        |        |                  |             |                                          |                                                         |                                  |
| Sebastian                                                                                                                                               | Guelfi       |        |                  |             |                                          |                                                         |                                  |
| Valentina                                                                                                                                               | Escott-Price |        |                  |             |                                          |                                                         |                                  |
| Viorica                                                                                                                                                 | Chelban      |        |                  |             |                                          |                                                         |                                  |
| Thomas                                                                                                                                                  | Foltynie     |        |                  |             |                                          |                                                         |                                  |
| Nigel                                                                                                                                                   | Williams     |        |                  |             |                                          |                                                         |                                  |
| Alexis                                                                                                                                                  | Brice        |        |                  |             |                                          |                                                         |                                  |

Supplemental Online Content: Nonauthor Collaborators

| First Name and Middle Initial(s) | Last Name         | Suffix | Academic Degrees | Institution | Location (city, state/province, country) | Role or Contribution, eg, chair, principal investigator | Subgroup, eg, Steering Committee |
|----------------------------------|-------------------|--------|------------------|-------------|------------------------------------------|---------------------------------------------------------|----------------------------------|
| Fabrice                          | Danjou            |        |                  |             |                                          |                                                         |                                  |
| Suzanne                          | Lesage            |        |                  |             |                                          |                                                         |                                  |
| Jean-Christophe                  | Corvol            |        |                  |             |                                          |                                                         |                                  |
| Maria                            | Martinez          |        |                  |             |                                          |                                                         |                                  |
| Claudia                          | Schulte           |        |                  |             |                                          |                                                         |                                  |
| Kathrin                          | Brockmann         |        |                  |             |                                          |                                                         |                                  |
| Javier                           | Simón-Sánchez     |        |                  |             |                                          |                                                         |                                  |
| Peter                            | Heutink           |        |                  |             |                                          |                                                         |                                  |
| Patrizia                         | Rizzu             |        |                  |             |                                          |                                                         |                                  |
| Manu                             | Sharma            |        |                  |             |                                          |                                                         |                                  |
| Thomas                           | Gasser            |        |                  |             |                                          |                                                         |                                  |
| Aude                             | Nicolas           |        |                  |             |                                          |                                                         |                                  |
| Mark R.                          | Cookson           |        |                  |             |                                          |                                                         |                                  |
| Sara                             | Bandres-Ciga      |        |                  |             |                                          |                                                         |                                  |
| Cornelis                         | Blauwendraat      |        |                  |             |                                          |                                                         |                                  |
| David W.                         | Craig             |        |                  |             |                                          |                                                         |                                  |
| Faraz                            | Faghri            |        |                  |             |                                          |                                                         |                                  |
| J. Raphael                       | Gibbs             |        |                  |             |                                          |                                                         |                                  |
| Dena G.                          | Hernandez         |        |                  |             |                                          |                                                         |                                  |
| Kendall                          | Van Keuren-Jensen |        |                  |             |                                          |                                                         |                                  |
| Joshua M.                        | Shulman           |        |                  |             |                                          |                                                         |                                  |
| Hampton L.                       | Leonard           |        |                  |             |                                          |                                                         |                                  |
| Mike A.                          | Nalls             |        |                  |             |                                          |                                                         |                                  |
| Laurie                           | Robak             |        |                  |             |                                          |                                                         |                                  |
| Steven                           | Lubbe             |        |                  |             |                                          |                                                         |                                  |
| Steven                           | Finkbeiner        |        |                  |             |                                          |                                                         |                                  |
| Niccolo E.                       | Mencacci          |        |                  |             |                                          |                                                         |                                  |
| Codrin                           | Lungu             |        |                  |             |                                          |                                                         |                                  |
| Andrew B                         | Singleton         |        |                  |             |                                          |                                                         |                                  |
| Sonja W.                         | Scholz            |        |                  |             |                                          |                                                         |                                  |
| Xylena                           | Reed              |        |                  |             |                                          |                                                         |                                  |
| Roy N.                           | Alcalay           |        |                  |             |                                          |                                                         |                                  |

## Supplemental Online Content: Nonauthor Collaborators

| First Name and Middle Initial(s) | Last Name          | Suffix | Academic Degrees | Institution | Location (city, state/province, country) | Role or Contribution, eg, chair, principal investigator | Subgroup, eg, Steering Committee |
|----------------------------------|--------------------|--------|------------------|-------------|------------------------------------------|---------------------------------------------------------|----------------------------------|
| Ziv                              | Gan-Or             |        |                  |             |                                          |                                                         |                                  |
| Guy A.                           | Rouleau            |        |                  |             |                                          |                                                         |                                  |
| Lynne                            | Krohn              |        |                  |             |                                          |                                                         |                                  |
| Jacobus J.                       | van Hilten         |        |                  |             |                                          |                                                         |                                  |
| Johan                            | Marinus            |        |                  |             |                                          |                                                         |                                  |
| Astrid D.                        | Adarmes-Gómez      |        |                  |             |                                          |                                                         |                                  |
| Miquel                           | Aguilar            |        |                  |             |                                          |                                                         |                                  |
| Ignacio                          | Alvarez            |        |                  |             |                                          |                                                         |                                  |
| Victoria                         | Alvarez            |        |                  |             |                                          |                                                         |                                  |
| Francisco                        | Javier Barrero     |        |                  |             |                                          |                                                         |                                  |
| Jesús A.                         | Bergareche Yarza   |        |                  |             |                                          |                                                         |                                  |
| Inmaculada                       | Bernal-Bernal      |        |                  |             |                                          |                                                         |                                  |
| Marta                            | Blazquez           |        |                  |             |                                          |                                                         |                                  |
| Marta                            | Bonilla-Toribio    |        |                  |             |                                          |                                                         |                                  |
| Juan A.                          | Botía              |        |                  |             |                                          |                                                         |                                  |
| María T.                         | Boungiorno         |        |                  |             |                                          |                                                         |                                  |
| Dolores                          | Buiza-Rueda        |        |                  |             |                                          |                                                         |                                  |
| Ana                              | Càmara             |        |                  |             |                                          |                                                         |                                  |
| Fátima                           | Carrillo           |        |                  |             |                                          |                                                         |                                  |
| Mario                            | Carrión-Claro      |        |                  |             |                                          |                                                         |                                  |
| Debora                           | Cerdan             |        |                  |             |                                          |                                                         |                                  |
| Jordi                            | Clarimón           |        |                  |             |                                          |                                                         |                                  |
| Yaroslau                         | Compta             |        |                  |             |                                          |                                                         |                                  |
| Monica                           | Diez-Fairen        |        |                  |             |                                          |                                                         |                                  |
| Oriol                            | Dols-Icardo        |        |                  |             |                                          |                                                         |                                  |
| Jacinto                          | Duarte             |        |                  |             |                                          |                                                         |                                  |
| Raquel                           | Duran              |        |                  |             |                                          |                                                         |                                  |
| Francisco                        | Escamilla-Sevilla  |        |                  |             |                                          |                                                         |                                  |
| Mario                            | Ezquerria          |        |                  |             |                                          |                                                         |                                  |
| Cici                             | Feliz              |        |                  |             |                                          |                                                         |                                  |
| Manel                            | Fernández          |        |                  |             |                                          |                                                         |                                  |
| Rubén                            | Fernández-Santiago |        |                  |             |                                          |                                                         |                                  |

## Supplemental Online Content: Nonauthor Collaborators

| First Name and Middle Initial(s) | Last Name          | Suffix | Academic Degrees | Institution | Location (city, state/province, country) | Role or Contribution, eg, chair, principal investigator | Subgroup, eg, Steering Committee |
|----------------------------------|--------------------|--------|------------------|-------------|------------------------------------------|---------------------------------------------------------|----------------------------------|
| Ciara                            | Garcia             |        |                  |             |                                          |                                                         |                                  |
| Pedro                            | García-Ruiz        |        |                  |             |                                          |                                                         |                                  |
| Pilar                            | Gómez-Garre        |        |                  |             |                                          |                                                         |                                  |
| Maria J.                         | Gomez Heredia      |        |                  |             |                                          |                                                         |                                  |
| Isabel                           | Gonzalez-Aramburu  |        |                  |             |                                          |                                                         |                                  |
| Ana G.                           | Pagola             |        |                  |             |                                          |                                                         |                                  |
| Janet                            | Hoenicka           |        |                  |             |                                          |                                                         |                                  |
| Jon                              | Infante            |        |                  |             |                                          |                                                         |                                  |
| Adriano                          | Jimenez-Escrig     |        |                  |             |                                          |                                                         |                                  |
| Jaime                            | Kulisevsky         |        |                  |             |                                          |                                                         |                                  |
| Miguel A.                        | Labrador-Espinosa  |        |                  |             |                                          |                                                         |                                  |
| Jose Luis                        | Lopez-Sendon       |        |                  |             |                                          |                                                         |                                  |
| Adolfo López de Mu               | Arregui            |        |                  |             |                                          |                                                         |                                  |
| Daniel                           | Macias             |        |                  |             |                                          |                                                         |                                  |
| Irene Martínez                   | Torres             |        |                  |             |                                          |                                                         |                                  |
| Juan                             | Marín              |        |                  |             |                                          |                                                         |                                  |
| Maria Jose                       | Marti              |        |                  |             |                                          |                                                         |                                  |
| Juan Carlos                      | Martínez-Castrillo |        |                  |             |                                          |                                                         |                                  |
| Carlota                          | Mèndez-del-Barrio  |        |                  |             |                                          |                                                         |                                  |
| Manuel Menéndez                  | González           |        |                  |             |                                          |                                                         |                                  |
| Marina Mata                      | Adolfo Mínguez     |        |                  |             |                                          |                                                         |                                  |
| Pablo                            | Mir                |        |                  |             |                                          |                                                         |                                  |
| Elisabet Mondragor               | Rezola             |        |                  |             |                                          |                                                         |                                  |
| Esteban                          | Muñoz              |        |                  |             |                                          |                                                         |                                  |
| Javier                           | Pagonabarraga      |        |                  |             |                                          |                                                         |                                  |
| Pau                              | Pastor             |        |                  |             |                                          |                                                         |                                  |
| Francisco Perez                  | Errazquin          |        |                  |             |                                          |                                                         |                                  |
| Teresa                           | Periñán-Tocino     |        |                  |             |                                          |                                                         |                                  |
| Javier                           | Ruiz-Martínez      |        |                  |             |                                          |                                                         |                                  |
| Clara                            | Ruz                |        |                  |             |                                          |                                                         |                                  |
| Antonio Sanchez                  | Rodriguez          |        |                  |             |                                          |                                                         |                                  |
| María                            | Sierra             |        |                  |             |                                          |                                                         |                                  |

## Supplemental Online Content: Nonauthor Collaborators

| First Name and Middle Initial(s) | Last Name        | Suffix | Academic Degrees | Institution | Location (city, state/province, country) | Role or Contribution, eg, chair, principal investigator | Subgroup, eg, Steering Committee |
|----------------------------------|------------------|--------|------------------|-------------|------------------------------------------|---------------------------------------------------------|----------------------------------|
| Esther                           | Suarez-Sanmartin |        |                  |             |                                          |                                                         |                                  |
| Cesar                            | Tabernero        |        |                  |             |                                          |                                                         |                                  |
| Juan Pablo                       | Tartari          |        |                  |             |                                          |                                                         |                                  |
| Cristina                         | Tejera-Parrado   |        |                  |             |                                          |                                                         |                                  |
| Eduard                           | Tolosa           |        |                  |             |                                          |                                                         |                                  |
| Francesc                         | Valldoriola      |        |                  |             |                                          |                                                         |                                  |
| Laura                            | Vargas-González  |        |                  |             |                                          |                                                         |                                  |
| Lydia                            | Vela             |        |                  |             |                                          |                                                         |                                  |
| Francisco                        | Vives            |        |                  |             |                                          |                                                         |                                  |
| Alexander                        | Zimprich         |        |                  |             |                                          |                                                         |                                  |
| Lasse                            | Pihlstrom        |        |                  |             |                                          |                                                         |                                  |
| Mathias                          | Toft             |        |                  |             |                                          |                                                         |                                  |
| Sulev                            | Koks             |        |                  |             |                                          |                                                         |                                  |
| Pille                            | Taba             |        |                  |             |                                          |                                                         |                                  |
| Sharon                           | Hassin-Baer      |        |                  |             |                                          |                                                         |                                  |
| John                             | Hardy            |        |                  |             |                                          |                                                         |                                  |
| Michael                          | Weale            |        |                  |             |                                          |                                                         |                                  |
| Mina                             | Ryten            |        |                  |             |                                          |                                                         |                                  |
| Daniah                           | Trabzuni         |        |                  |             |                                          |                                                         |                                  |
| Adaikalavan                      | Ramasamy         |        |                  |             |                                          |                                                         |                                  |
| Colin                            | Smith            |        |                  |             |                                          |                                                         |                                  |
| Manuel Sebastian                 | Guelfi           |        |                  |             |                                          |                                                         |                                  |
| Karishma                         | D'sa             |        |                  |             |                                          |                                                         |                                  |
| Paola                            | Forabosco        |        |                  |             |                                          |                                                         |                                  |
| Juan A.                          | Botiá            |        |                  |             |                                          |                                                         |                                  |
